# Supplementary material
Source: PubMed Central journal article supplement (PMC3497790)
Supplement: 1210925109_pnas.201210925SI.pdf [file 1210925109_pnas.201210925SI.pdf]

# Supporting Information

Brindley et al. 10.1073/pnas.1210925109

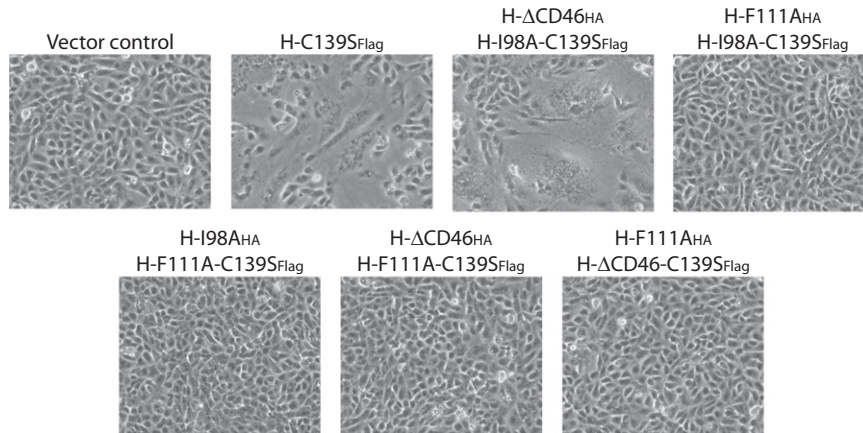

**Fig. S1.** Cysteine engineering to assess selective H transcomplementation on a homodimer/heterotetramer level. Microphotographs of Vero cells co-transfected with measles virus (MeV) fusion protein (F) and the specified attachment protein (H) constructs were taken 15 h posttransfection. (Magnification: 200 $\times$ .)

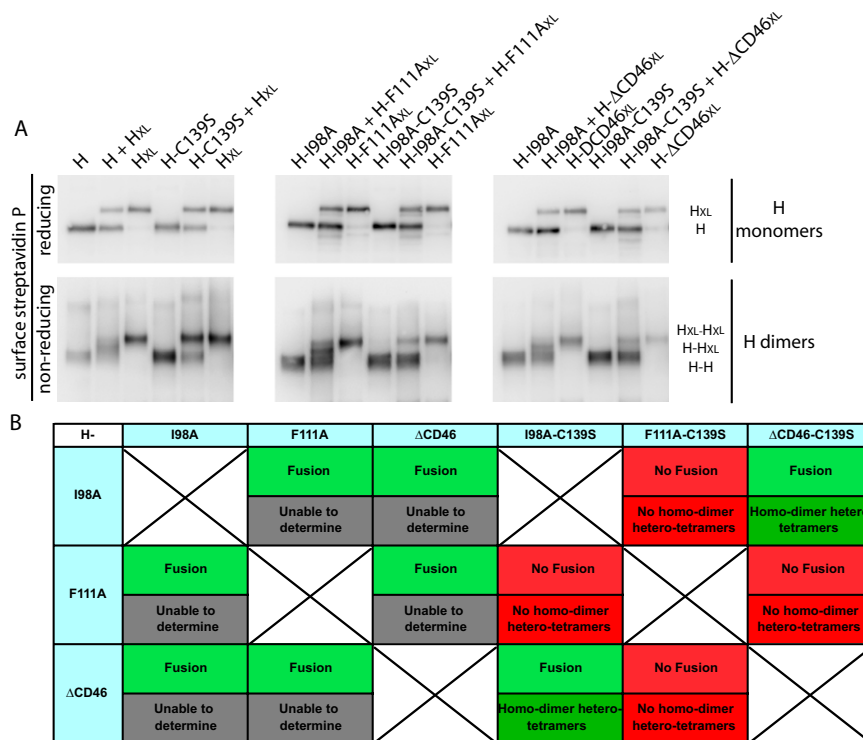

**Fig. S2.** H-F111A homodimers are structurally distinct from homodimers of H or other H complementation groups. (A) Gel-fractionation of surface-exposed H under reducing and nonreducing conditions. Where indicated, H proteins contained a C-terminal single-chain antibody size tag ( $H_{XL}$ ). The migration positions of H monomers (H,  $H_{XL}$ ) and covalently linked dimers (H-H,  $H_{XL}$ - $H_{XL}$ , H- $H_{XL}$ ) are highlighted. (B) Phenotype matrix of all H variants subjected to trans-complementation experiments. For each combination, fusion activity determined in cell-to-cell fusion assays and the ability to form homodimer hetero-tetramers are shown.

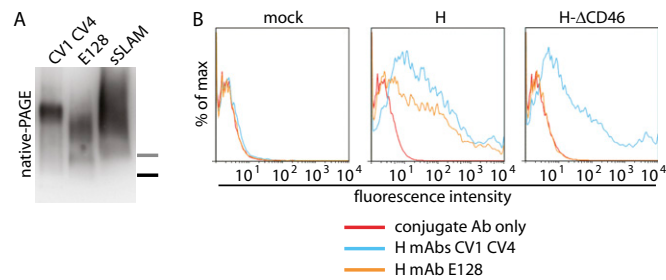

**Fig. 53.** Characterization of soluble proteinaceous H ligands. (A) Native-PAGE analysis of mAbs CV1 and CV4 and E128 and of soluble purified signaling lymphocyte activation molecule (sSLAM) demonstrates a similar mobility pattern in the absence of MeV H complexes. Immunoblots were decorated with  $\alpha$ -mouse conjugate antiserum. For orientation, the mobility markers of the different-conformation MeV H tetramers (as in Fig. 3C) are shown. (B) Flow cytometric analysis of cells expressing MeV H or the H- $\Delta$ CD46 variant that lacks the ability to recognize the CD46 receptor. The mAb E128 epitope overlaps with the CD46 RBS, whereas mAbs CV1 and CV4 recognize distinct epitopes in the H head domain.

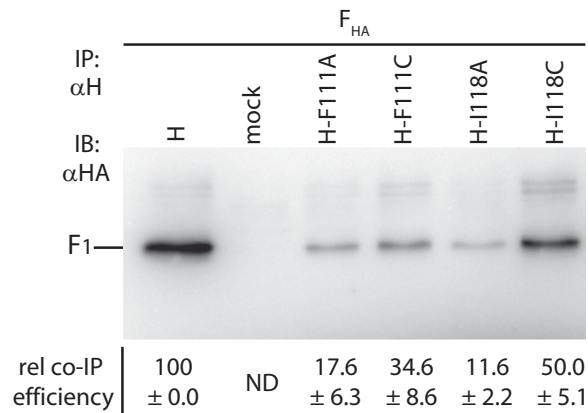

**Fig. 54.** Coimmunoprecipitation (co-IP) of surface-exposed MeV F<sub>HA</sub> with MeV H. Surface-exposed glycoprotein complexes were chemically cross-linked with membrane-impermeable 3,3'-Dithiobis[sulfosuccinimidylpropionate] (DTSSP), followed by immunoprecipitation of H with an mAb mixture directed against the H ectodomain, SDS/PAGE, and immunoblotting with specific antibodies directed against the HA epitope. Cells expressing F alone served as specificity control (mock). Values below the immunoblots represent relative F coimmunoprecipitation efficiencies; averages of four independent experiments  $\pm$  SEM are shown.



**Table S1. Molecular characterization of mutant H protein variants**

| H construct*                         | H surface expression <sup>†</sup><br>(% of MeV H <sub>FLAG</sub> ) | Receptor binding <sup>‡</sup><br>(SLAM:H ratio; % of H <sub>FLAG</sub> ) | Fusion activity <sup>§</sup><br>(% of MeV H <sub>FLAG</sub> ) |
|--------------------------------------|--------------------------------------------------------------------|--------------------------------------------------------------------------|---------------------------------------------------------------|
| H                                    | 106.2 ± 3.5                                                        | 1.00 ± 0.04                                                              | 108.6 ± 4.3                                                   |
| H <sub>FLAG</sub>                    | 100 ± 0.0                                                          | 0.95 ± 0.08                                                              | 100 ± 0.0                                                     |
| H <sub>HA</sub> <sup>§</sup>         | 95.7 ± 16.2                                                        | 1.00 ± 0.19                                                              | 104.9 ± 5.3                                                   |
| H-C139S <sub>FLAG</sub>              | 87.4 ± 5.6                                                         | 0.86 ± 0.09                                                              | 60.7 ± 8.5                                                    |
| H-I98A <sub>HA</sub> <sup>§</sup>    | 113.1 ± 9.1                                                        | 0.90 ± 0.03                                                              | 4.3 ± 0.7                                                     |
| H-F111A <sub>FLAG</sub> <sup>§</sup> | 70.2 ± 2.6                                                         | 1.06 ± 0.04                                                              | 0.2 ± 0.1                                                     |
| H-F111A <sub>HA</sub> <sup>§</sup>   | 85.3 ± 3.2                                                         | 1.00 ± 0.10                                                              | 0.2 ± 0.1                                                     |
| H-ΔCD46 <sub>FLAG</sub> <sup>§</sup> | 109.1 ± 3.3                                                        | 1.00 ± 0.03                                                              | 9.1 ± 0.9                                                     |
| H-ΔCD46 <sub>HA</sub>                | 123.3 ± 2.5                                                        | 0.90 ± 0.01                                                              | 11.1 ± 1.3                                                    |
| H-I98A-C139S <sub>FLAG</sub>         | 113.5 ± 8.1                                                        | 0.96 ± 0.04                                                              | 1.7 ± 1.5                                                     |
| H-F111A-C139S <sub>FLAG</sub>        | 106.6 ± 8.4                                                        | 0.92 ± 0.06                                                              | 0.7 ± 0.5                                                     |
| H-ΔCD46-C139S <sub>FLAG</sub>        | 57.5 ± 1.2                                                         | 0.90 ± 0.07                                                              | 0.1 ± 0.01                                                    |
| H <sub>XL-FLAG</sub>                 | 84.8 ± 6.2                                                         | ND <sup>¶</sup>                                                          | 90.9 ± 5.2                                                    |
| H <sub>XXL-FLAG</sub>                | 58.4 ± 6.8                                                         | 0.44 ± 0.05                                                              | 56.1 ± 3.9                                                    |
| H-F111A <sub>XXL-FLAG</sub>          | 77.3 ± 12.8                                                        | 0.54 ± 0.08                                                              | 0.1 ± 0.01                                                    |
| H-ΔCD46 <sub>XXL-FLAG</sub>          | 36.9 ± 5.8                                                         | 0.52 ± 0.05                                                              | 3.5 ± 0.09                                                    |
| H-C139S <sub>XXL-FLAG</sub>          | 69.2 ± 7.7                                                         | 0.49 ± 0.15                                                              | 30.3 ± 4.1                                                    |
| H-H71C <sub>FLAG</sub>               | 103.6 ± 10.6                                                       | 0.78 ± 0.12                                                              | 18.2 ± 7.01                                                   |
| H-K72C <sub>FLAG</sub>               | 61.3 ± 8.9                                                         | 0.81 ± 0.09                                                              | 0.3 ± 0.08                                                    |
| H-S73C <sub>FLAG</sub>               | 150.3 ± 12.4                                                       | 0.92 ± 0.05                                                              | 118.7 ± 24.8                                                  |
| H-L74C <sub>FLAG</sub>               | 122.2 ± 9.5                                                        | 0.97 ± 0.08                                                              | 100.7 ± 10.5                                                  |
| H-R110C <sub>FLAG</sub>              | 96.6 ± 2.7                                                         | 0.71 ± 0.17                                                              | 0.4 ± 0.2                                                     |
| H-F111C <sub>FLAG</sub>              | 139.3 ± 13.7                                                       | 0.89 ± 0.04                                                              | 0.5 ± 0.1                                                     |
| H-T112C <sub>FLAG</sub>              | 149.6 ± 12.0                                                       | 0.82 ± 0.15                                                              | 10.7 ± 2.6                                                    |
| H-L114C <sub>FLAG</sub>              | 150 ± 16.2                                                         | 0.87 ± 0.09                                                              | 0.1 ± 0.04                                                    |
| H-I118C <sub>FLAG</sub>              | 148.6 ± 14.5                                                       | 0.89 ± 0.07                                                              | 108.0 ± 14.9                                                  |
| H-I122C <sub>FLAG</sub>              | 9.0 ± 1.2                                                          | 0.31 ± 0.10                                                              | 0.4 ± 0.1                                                     |
| H-Y131C <sub>FLAG</sub>              | 107.0 ± 15.0                                                       | 0.77 ± 0.10                                                              | 58.2 ± 10.7                                                   |
| H-D132C <sub>FLAG</sub>              | 128.8 ± 4.6                                                        | 0.82 ± 0.12                                                              | 129.2 ± 13.1                                                  |
| H-N141C <sub>FLAG</sub>              | 87.6 ± 7.2                                                         | 1.05 ± 0.10                                                              | 5.4 ± 0.5                                                     |
| H-P142C <sub>FLAG</sub>              | 81.7 ± 13.0                                                        | 0.94 ± 0.06                                                              | 6.1 ± 1.7                                                     |
| H-P143C <sub>FLAG</sub>              | 85.9 ± 13.9                                                        | 0.92 ± 0.03                                                              | 0.1 ± 0.04                                                    |
| H-E144C <sub>FLAG</sub>              | 85.8 ± 11.2                                                        | 0.87 ± 0.03                                                              | 18.2 ± 3.2                                                    |
| H-R145C <sub>FLAG</sub>              | 79.6 ± 11.3                                                        | 0.86 ± 0.10                                                              | 28.0 ± 3.9                                                    |
| H-I146C <sub>FLAG</sub>              | 57.7 ± 14.6                                                        | 0.74 ± 0.08                                                              | 1.6 ± 0.4                                                     |
| H-K147C <sub>FLAG</sub>              | 74.1 ± 7.3                                                         | 0.84 ± 0.04                                                              | 0.2 ± 0.06                                                    |
| H-L148C <sub>FLAG</sub>              | 83.4 ± 8.3                                                         | 1.04 ± 0.18                                                              | 50.3 ± 9.9                                                    |
| H-D149C <sub>FLAG</sub>              | 97.9 ± 4.6                                                         | 0.91 ± 0.09                                                              | 0.1 ± 0.07                                                    |
| H-Y150C <sub>FLAG</sub>              | 96.9 ± 4.5                                                         | 0.98 ± 0.02                                                              | 4.9 ± 1.2                                                     |
| H-D151C <sub>FLAG</sub>              | 97.1 ± 5.9                                                         | 0.95 ± 0.13                                                              | 62.1 ± 9.9                                                    |
| H-Q152C <sub>FLAG</sub>              | 74.5 ± 5.4                                                         | 1.00 ± 0.12                                                              | 22.9 ± 8.6                                                    |

ND, not determined.

\*All constructs are based on H-Edm (1).

<sup>†</sup>Determined by flow-cytometric analysis of H expressing cells using H-specific antiserum; values are based on median fluorescence intensities, averages of at least three experiments ± SEM.

<sup>‡</sup>Determined by flow-cytometric analysis of H expressing cells using soluble SLAM and H-specific antisera; values represent median fluorescence intensities, averages of at least three experiments ± SEM.

<sup>§</sup>Determined by quantitative fusion assay in Vero cells, averages of at least three experiments ± SEM.

<sup>¶</sup>Surface expression and receptor binding values as reported in ref. 2.

<sup>¶</sup>SLAM-binding activity of this H variant demonstrated in ref. 3.

- Cathomen T, Naim HY, Cattaneo R (1998) Measles viruses with altered envelope protein cytoplasmic tails gain cell fusion competence. *J Virol* 72:1224–1234.
- Brindley MA, Plemper RK (2010) Blue native PAGE and biomolecular complementation reveal a tetrameric or higher-order oligomer organization of the physiological measles virus attachment protein H. *J Virol* 84:12174–12184.
- Hammond AL, et al. (2001) Single-chain antibody displayed on a recombinant measles virus confers entry through the tumor-associated carcinoembryonic antigen. *J Virol* 75: 2087–2096.
